## Perspective

# A Vision for Ubiquitous Sequencing

Yaniv Erlich<sup>1,2,\*</sup>

1 Department of Computer Science, Columbia University, New York, NY

2 New York Genome Center, New York, NY

\* E-mail: [yaniv@cs.columbia.edu](mailto:yaniv@cs.columbia.edu)

## Abstract

Genomics has recently celebrated reaching the \$1000 genome milestone, making affordable DNA sequencing a reality. This goal of the sequencing revolution has been successfully completed. Looking forward, the next goal of the revolution can be ushered in by the advent of sequencing sensors - miniaturized sequencing devices that are manufactured for real time applications and deployed in large quantities at low costs. The first part of this manuscript envisions applications that will benefit from moving the sequencers to the samples in a range of domains. In the second part, the manuscript outlines the critical barriers that need to be addressed in order to reach the goal of ubiquitous sequencing sensors.

## Introduction

The cost of DNA sequencing has plunged orders of magnitude in the last 25 years. Back in 1990, sequencing one million nucleotides cost the equivalent of 15 tons of gold (adjusted to 1990 price). At that time, this amount of material was equivalent to the output of all United States goldmines combined over two weeks. Fast-forward to the present, sequencing one million nucleotides is worth about 30 grams of aluminum. This is approximately the total amount of material needed to wrap five breakfast sandwiches at a New York City food cart. With such breathtaking pace, DNA sequencing has become the ultimate back-end of a wide spectrum of biological assays ([Shendure and Aiden, 2012](#)). A growing number of these assays simply take advantage of DNA or RNA for labeling, creating molecular post-its that can be read in a highly parallel and cost effective manner ([Levy et al., 2015](#); [Zador et al., 2012](#)). Paraphrasing the famous quote by James C. Maxwell ([Maxwell, 1864](#)), the aim of many experimental techniques is to reduce the problems of nature to the determination of DNA sequences.

So what is the next frontier of DNA sequencing? For decades, an affordable sequencing platform – the 1000\$ genome – has been the main focus ([Green et al., 2011](#)). While price was under strong selective pressure, the community has largely accepted sequencing devices in any shape and size. Examples of such devices include the now obsolete Heliscope by Helicos Biosciences, which contained a 100kg granite slab to stabilize the sequencers ([Davies, 2010](#)) and the 860kg PacBios RSII instrument with its large footprint (**Figure 1A**). In stark contrast, the last year has witnessed the emergence of small footprint sequencers with the successful early access program of the handheld Oxford Nanopore MinION ([Loman and Watson, 2015](#)) (**Figure 1B**) and an ongoing development of relatively small sequencers by other companies such as Genapsys (**Figure 1C**).

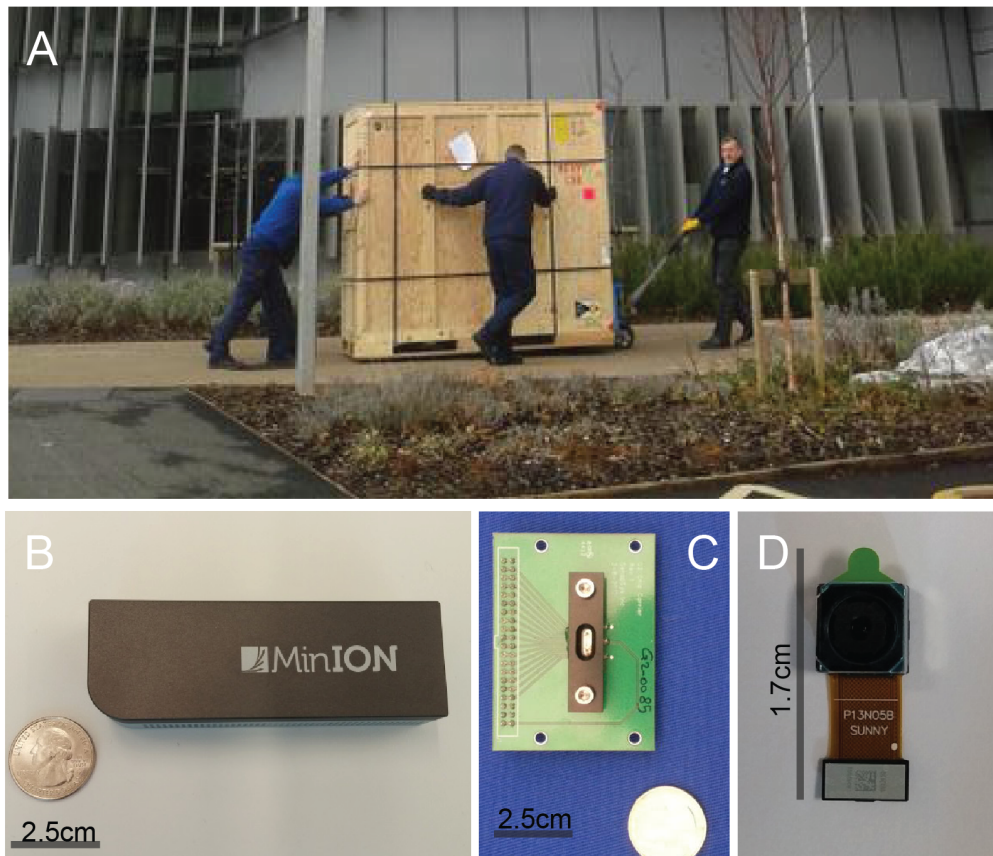

**Figure 1: Sizes of DNA sequencers** (A) Three men haul a 860Kg PacBio RSII to the University of Exter [photo courtesy of @PsyEpigenetics] (B) MinION sequencer (C) An early prototype of a Genapsys flowcell The company develops an iPad size sequencer (D) A commodity digital camera chip ready for a cellphone integration. Can DNA sequencers be that small?

With these exciting new developments, the next phase of the sequencing revolution is the emergence of DNA sequencing *sensors*. Different from massive sequencing *platforms* such as Illumina X Ten and PacBio RSII, sequencing sensors will be extremely miniaturized devices that include automatic sample preparation with the aim of real-time sequencing in the field (**Table 1**). By integrating these miniature sequencers in larger systems, they will add a DNA-awareness layer to various devices (**Figure 1D**). That being said, sequencing sensors will not replace the sequencing platforms in the foreseeable future; the latter will certainly be around for heavy-lifting tasks where scale matters, such as whole genome sequencing. Rather, sequencing sensors will enable a new range of applications that can substantially benefit from moving the sequencers to the samples instead of the traditional way of moving the samples to the sequencers. With this goal in mind, the cost per base pair (bp), extremely high accuracy, and other traditional parameters of sequencing performance will be of secondary importance. More attention will be devoted to the cost of the device, seamless sample preparation, latency of sequencing results,

| Feature           | Sequencing platform      | Sequencing sensor                 |
|-------------------|--------------------------|-----------------------------------|
| Operation         | Static                   | Mobile (or enviromentally robust) |
| I/O               | Fancy touch screens      | API                               |
| Cost of sequencer | Less important           | Important                         |
| Cost per bp       | Important                | Less important                    |
| Capacity          | Important                | Less important                    |
| Speed             | Less important           | Important                         |
| Accuracy          | Important                | Less important                    |
| Bandwidth         | High                     | Low                               |
| Latency           | High                     | Low                               |
| Main application  | Finding genetic variants | Quantifying DNA molecules         |
| Made for          | Human                    | Machines                          |

**Table 1: Sequencing platforms vs. sequencing sensors**

and environmental robustness. Here, I envision potential applications of sequencing sensors in different domains, map chief engineering challenges, and briefly discuss potential regulatory issues of ubiquitous sequencing.

## Potential applications of sequencing sensors

### Forensic applications

DNA forensics for counter-terrorism and law enforcement applications can highly benefit from rapid sequencing sensors. Currently, the DNA evidence processing chain includes evidence collection, shipment of evidence to a local crime lab, isolation of DNA, generating an STR profile using capillary electrophoresis, and a database search – a process that usually takes days to complete (Kayser and de Knijff, 2012). Quick sequencing of DNA evidence at the crime scene can reveal the suspects identity in the critical time after the event to reduce the chance that the suspect will successfully flee, destroy evidence, or mount an additional attack. First responders of serious crimes will be able operate the system that can automatically notify other forces or border control of the suspects identity to better focus the efforts to capture the suspect. Such a technology might also have military uses. Recent reports revealed that at least in one instance, US Special Forces used a DNA test for positive identification of a target of high interest. However, despite the importance of the target, the tests took more than eight hours before the assay could provide a final confirmation of the persons identity (Whitlock and Gellman, 2013).

Another application for rapid DNA-based sequencing is human identification at security check-points such as airports. While other biometric signatures such as fingerprints and physiometric structures are accurate and easy to obtain, DNA has the advantage of positive identification in the absence of a persons inclusion in a database (Erlich and Narayanan, 2014). Technically, this can be done by familial searches that rely on finding autosomal matches with first-degree

relatives (Bieber et al., 2006) or by surname inference techniques that leverage Y chromosome matches of distant relatives (Gymrek et al., 2013). With careful use that is sensitive to genetic privacy and cultural issues (Kim and Katsanis, 2013), such technology at checkpoints can play a role in fighting human trafficking. This horrific worldwide problem affects millions of victims, most of whom are children or young females and takes a substantial societal and economical toll in certain regions (US Department of State, 2014). Families of the abducted victim will contribute their own DNA to a specialized database that will only be used to locate their relatives, similar to the missing person database. Security forces at airports or borders can check individuals suspected to be at risk. To prevent misuse, samples will be immediately destroyed and results will not be saved upon a negative match.

For a technical perspective, the identification of humans DNA requires very low sequencing throughput. Currently, forensic DNA profiles are developed by genotyping 13-20 autosomal Short Tandem Repeat markers, which could be achieved with less than 4000bp of total sequencing throughput (Ge et al., 2012). However, to avoid the lengthy target enrichment, it might be more advantageous to utilize an extremely low throughput shotgun sequencing of the sample. Previous work has shown that any 200 common SNPs in linkage equilibrium create a unique profile for any person on earth (with the exception of monozygotic twins) (Lin et al., 2004). At least theoretically, a similar number of long (>1000bp) reads could ascertain this number of SNPs. This will probably require a few thousand reads to ascertain additional SNPs and obtain higher levels of confidence. The variant calling can be done together with an aggressive genetic imputation which was shown to substantially improve the calling of common variants despite extremely low sequencing coverage (Pasaniuc et al., 2012). Finally, sample identification will rely on querying a forensic database of whole genome sequencing or genome-wide arrays.

## Sequencing at home

Sequencing sensors will also enable the advent of DNA-aware home appliances, continuing the growing trend of smart devices that monitor the household environment such as Nest Protect that senses CO and smoke levels. Multiple appliances could benefit from integration with sequencing sensors, including air conditioning or the main water supply to monitor harmful pathogens. However, of all possible options, toilets may offer the best integration point for sequencing sensors. First, toilets regularly collect a large amount of biological material as part of our daily life. There is no need for new routines or special procedures, solving a major usability barrier. In addition, it is also possible to monitor pathogens in the water supply. Second, toilet integration can solve certain engineering complications, such as access to fresh water and a place to drain sequencing waste (although access to electricity is expected to be complicated). Most toilets are designed to have space below the water tank, which is rarely occupied. This could be a convenient area to place a small system without substantial miniaturization burden. Third, as opposed to most appliances such as refrigerators or dishwashers, many houses have more than one toilet, increasing the potential market size for such a device. A smart toilet system can convey extremely rich information about household members for medical and dietary purposes. It will allow monitoring fluctuations in the host microbiome and other potential indicators of the wellbeing of gastrointestinal and renal systems. Since waste also contains the host DNA,

it will be possible to seamlessly assign the sequencing results to a specific individual without additional user involvement. In addition, it might be possible to track food composition from waste in order to automatically log dietary habits.

Another exciting opportunity is bringing sequencing sensors to the hands of the general public. With the growing interest in self-tracking, an affordable sequencing sensor with automatic sample preparation has the potential to be a trendy – and admittedly quite geeky – technological accessory. Just a year ago, about 13,000 Kickstarter backers pledged over \$2 million to develop SCiO, a low-cost handheld spectrometer that is intended to sense the chemical makeup of food and drugs, highlighting the potential market for similar DNA-aware devices. Bringing sequencing sensors to the masses also has the advantage of crowd-sourcing DNA or RNA signatures from various sources. This can facilitate the development of interpretation apps in domains that have received relatively low attention from traditional scientific endeavors such as collecting microbiome signatures in various spoiling stages of food or spotting stores that mislabel seafood products.

## Food industry

Sequencing food products does not have to be done by consumers but can be integrated at various stages of the entire supply chain. Preliminary studies have shown that DNA sequencing can answer various food-related applications including distinguishing morphologically-similar poisonous and edible mushrooms, detecting the accumulation of pathogenic microbes in meat, tracing the fermentation of cheeses, identifying hidden traces of allergens, and even predicting the ripening time of avocados (Dopico et al., 1993; Galimberti et al., 2013; Wolfe and Dutton, 2015; Dugat-Bony et al., 2015). The real challenge will be to perform these assays outside of a laboratory setting as an integral part of the food supply chain.

Instead of analyzing naturally occurring sequences, ubiquitous sequencing in the food industry can also utilize barcoding of food products with artificial DNA tags. Recent work has tested the usage of such tags in the food supply chain by delivering exogenous DNA fragments within a coat of silica, a common food additive, at an extremely low cost. They showed that these tags could be used to trace the source of milk in dairy products such as yogurt (Bloch et al., 2014) and serve as a long-term authentication mark of premium olive oil (Puddu et al., 2014). Moving forward, artificial DNA labels can create an editable data structure that includes the type of food, producer, lot number, nutrient information, and presence of known allergens. Alternatively, this data structure can simply encode a URL to a webpage that contains this information. The length of the DNA label can be relatively short, as recent DNA-specific encoding schemes have proposed methods to robustly code 1.6bits of information in each DNA base pair (Goldman et al., 2013). Taken together, DNA-labeled products can establish an inexpensive method to identify ingredients and sources of processed food, tracking authenticity and revealing hidden traces of allergens. In addition, if it is possible to precisely quantify DNA labels from human waste, this scheme coupled with smart toilet systems (discussed above) will enable automatic logging of ingredient consumption. This can revolutionize the tedious manual process of documenting food intake, which is a key component of various diet programs and can help researchers gain



substantial amounts of data correlating ingredient consumption and illness.

## Health related applications

Real time DNA sequencing has remarkable potential for diagnosing infectious diseases by bringing the sequencers to at-risk individuals. For example, rapid sequencing at airport checkpoints might be useful to control pathogen outbreaks and offer medical assistance to affected passengers. Similarly, a portable sequencer will enable physicians to provide more accurate diagnoses in the field during humanitarian crises or in the clinic without the need to waste time by sending samples to a lab. A more bold approach is to leverage the at-home sequencing devices presented above. By careful development of at-home tests, sequencing sensors will allow patients to obtain data on infectious disease in the comfort of their own homes, reducing both the misery of getting out of bed while sick and the risk of infecting others. Specialized apps will integrate the sequence reads with other physiological measures and patient complaints. A virtual physician visit (or an FDA-approved fully automated program) will conclude the diagnosis and decide on the course of treatment specific to the pathogen.

Sequencing sensors can also allow pathogen surveillance by constant monitoring of key junctions for disease spreading routes such as hospital laundry (Fijan and Turk, 2012), hotel water systems's (Mouchtouri et al., 2007), central air conditioning systems (Tringe et al., 2008), and municipal sewage (King, 2014). Multiple studies have highlighted the utility of DNA sequencing for disease surveillance including the 2011 outbreak of E. coli O104:H4 in Germany (Rohde et al., 2011) and the 2014 Ebola pandemic in West Africa (Gire et al., 2014). These efforts played a key role in identifying the pathogenic strain, tracing its evolution, and reconstructing the diseases spread. However, it should be noted that pathogen surveillance from environmental samples before an outbreak will be far more challenging than these retrospective analyses that had the advantage of diagnosed patients. Recent studies have shown that under certain conditions species annotation pipelines can report questionable results such as the presence of endemic species in samples that were collected far away from their natural habitats or the detection of nearly extinct pathogens (Gonzalez et al., 2014; Afshinnekoo et al., 2015; Mason, 2015). These errors stem from reads with local sequence similarity to the genomes of unrelated organisms or reflect horizontal gene transfer between species. In addition, the field has yet to establish a comprehensive knowledge of the genomic sequences of many microorganisms, increasing the likelihood of species misidentification. Addressing these challenges will necessitate long sequence reads for increased specificity, further maturation of analytical frameworks, and expanding databases of annotated species.

Additional potential usage for DNA sequencing sensors includes integration with medical devices for real-time monitoring of cell-free DNA and RNA in patients. These molecules are released into the plasma due to multiple biological process, including cancer, conferring a diagnostic vantage point without invasive biopsies (Van Der Vaart and Pretorius, 2008). Multiple lines of evidence have shown that these nucleic acids can be used as biomarkers for a series of acute conditions, such as liver response to drug overdose (Wang et al., 2009), heart attack (Creemers et al., 2012), sepsis (Dwivedi et al., 2012), and brain trauma (Ohayon et al., 2012). Real-time

bedside sequencing at relatively short intervals can serve as the basis for a universal apparatus to capture these biomarkers, adding a new layer of information to patient status.

## Technological Challenges

Full realization of DNA sensors will require overcoming a multitude of barriers. Below is an outline of the main obstacles:

### Sample preparation

Mainstream protocols for shotgun sequencing are not compatible with the aim of real time miniaturized DNA sensors. They involve multiple chemical reactions and physical manipulations to purify DNA and tether the molecules to the sequencing apparatus, inducing a substantial latency and complicating miniaturization. Multiplexed target enrichment protocols, such as in-solution capture, are even more involved. They consist of even more complex steps, including condensation of intermediate reactions, rapid cooling and heating, and a long ( $\geq 24$ hr) hybridization step.

Recent advancements have the potential to greatly facilitate the advent of rapid and miniature library preparation methods. A new single cell sequencing method has proposed a microfluidic-based technique to perform most of the RNA library preparation within droplets (Basu et al., 2014). This procedure compresses a large number of processing stages into one step and creates a scalable method for in-situ library preparation. GnuBIO, a BioRad company, develops a microfluidic-based system for genomic library preparation that is completely integrated within their benchtop sequencer. If successful, this system will allow an end-to-end automated sequencing pipeline that starts with genomic DNA samples. Another alternative is to simplify library preparation by avoiding multiplexed target enrichment. Most of the applications mentioned above could either utilize shotgun sequencing or focus on a single region using a miniaturized PCR machine.

### Supply of reagents

Low maintenance and environmental robustness are key issues for sequencing sensors. However, current sequencing technologies need multiple types of reagents such as DNA polymerase (Illumina, IonTorrent, and Pacific Biosciences, Genia), biological pores coupled to a motor enzyme (Oxford Nanopore), modified nucleotides (Illumina & Pacific Biosciences), and exogenous DNA primers (all technologies). These have relatively low durability and some of them also needed to be stored at 4C or -20C. One possible solution to reduce the burden of loading reagents onto sequencing sensors is a user-friendly cartridge on which sensitive reagents can be lyophilized to allow storage at room temperature. A non-mutually exclusive effort is to minimize the types of reagents and prolong their durability. Previous studies have suggested that solid-state nanopores can confer increased robustness and durability over protein-based nanopores in lipid

bilayers (Dekker, 2007; Venkatesan and Bashir, 2011). These solid-state nanopores might have the ability to sense naturally occurring DNA without any modification, which can greatly reduce the need of a reagent supply.

## **Analytics**

An open question is how to perform the data analytics for sequencing sensors. Current sequencing platforms push low level data from the machine and use external computers for almost all of the downstream data processing, from registering the sequencing signals via base-calling to alignment. Mobile sequencing sensors can wirelessly push raw data to the cloud or a local server as they sequence the samples. However, this will require data streams that are sufficiently compact to work with the bandwidth of mobile communication.

Latency is another factor of data analytics. Most sequence analysis algorithms are devised as offline programs that assume that all input data is available at the beginning of the run and that files are read and written at each stage (but see (Chiang et al., 2014)). Reducing the latency time could benefit from online bioinformatics pipelines that will align sequence reads as the flow of bases continues to arrive from the basecaller and make on-the-fly decisions before the full data is analyzed, such as pathogen detection from sufficient evidence. Unlike most data analytics today, sequencing sensor analytics should provide succinct and concrete information. The typical user will not care about quality recalibration or left alignment of indels and will have zero knowledge or patience to deal with bioinformatics issues. All he wants are short answers such as Meat is spoiled: dont eat or suspect identified as Mr. X. Simple and reliable reports will be key.

## **ELSI aspects of ubiquitous sequencing**

The advent of ubiquitous sequencing can trigger a wide range of ethical, legal, and social implications (ELSI). Previous work has discussed some of these aspects in depth [for example: (Joh, 2006; Presidential Commission for the Study of Bioethical Issues, 2012; Rodriguez et al., 2013)]. But to highlight the complexities, consider the following hypothetical case of citizen forensics. The case starts with an internal theft at a company. Worried about the companys public image, the security manager does not want to involve the police but decides to fire the person. He finds an empty coffee cup at the scene that the thief left behind. Excited, he uses his personal DNA sequencing device to develop a genetic profile. With the availability of massive genetic data online, he quickly identifies a specific worker, who is fired immediately by the company. The worker files a complaint because the US Genetic Information Non-discrimination Act (GINA) prohibits employers to discharge, any employee because of genetic information with respect to the employee.

Complications can also arise from benign applications, such as environmental tracking of bacterial communities in the sewage system. Previous shotgun sequence-based studies showed that such samples could contain small levels of human contamination. This can contradict certain regulatory statutes that prohibit analysis of human DNA without consent, although this is not



the primary aim of the application. For example, in the UK, the Human Tissue Act requires consent for any collection of human DNA if there is intent to perform DNA analysis. In Israel, only authorized genetic labs can perform genetic tests on human DNA, with the exceptions of research and law enforcement purposes. In the US, abandoned DNA is not protected by the federal 4th amendment and it is legally possible to collect and analyze samples from public places as was well demonstrated by a recent art project (Gambino, 2013). However, certain states have imposed further regulation. For example, according to Section 79-L of the New York State Civil Rights Law, it is unlawful to "diagnose the presence" of genetic variations that are linked to human diseases without consent. A California senator recently proposed a more strict law similar to the UK law that will prohibit any collection of human DNA without consent with the exception of law enforcement purposes.

## Summary

With the advent of new miniature devices such as Oxford Nanopores MinION, we are on the cusp of truly democratizing DNA information by placing sequencers in the hands of the general public. Ubiquitous sequencing will create an incredibly powerful vantage point to observe massive amounts of DNA information within its natural context. This will open the possibility to integrate the DNA data with other types of sensor information and to obtain a more comprehensive picture of the world around us. To make this vision a reality, sequencing sensors will require numerous strides to address the gaps in sample collection, reagent supply and durability, and real time analytics. Like any powerful technology, it will create a range of societal questions necessitating an ongoing discussion between all stakeholders about the benefits and risks and placing safeguards that will increase the public trust.

## Acknowledgments

I would like to thank Dina Zielinski, Brian Houck-Loomis, and Shree Nayar for useful discussion. Y.E. holds a Career Award at the Scientific Interface from the Burroughs Wellcome Fund. This study was partially supported by an NIJ award 2014-DN-BX-K089.

## Potential Conflict of Interest

YE is a consultant of several companies in the area of genomics and forensics

## References

Ebrahim Afshinnekoo, Cem Meydan, Shanin Chowdhury, Dyala Jaroudi, Collin Boyer, Nick Bernstein, Julia M Maritz, Darryl Reeves, Jorge Gandara, Sagar Chhangawala, et al. Geospa-

- tial resolution of human and bacterial diversity with city-scale metagenomics. *Cell Systems*, 2015.
- Anindita Basu, Evan Macosko, Alex Shalek, Steven McCarroll, Aviv Regev, and Dave Weitz. Single-cell genomics using droplet-based microfluidics, 2014.
- Frederick R Bieber, Charles H Brenner, and David Lazer. Finding criminals through dna of their relatives. *SCIENCE-NEW YORK THEN WASHINGTON-*, 5778:1315, 2006.
- Madeleine S Bloch, Daniela Paunescu, Philipp R Stoessel, Carlos A Mora, Wendelin J Stark, and Robert N Grass. Labeling milk along its production chain with dna encapsulated in silica. *Journal of agricultural and food chemistry*, 62(43):10615–10620, 2014.
- Colby Chiang, Ryan M Layer, Gregory G Faust, Michael R Lindberg, David B Rose, Erik P Garrison, Gabor T Marth, Aaron R Quinlan, and Ira M Hall. Speedseq: Ultra-fast personal genome analysis and interpretation. *bioRxiv*, page 012179, 2014.
- Esther E Creemers, Anke J Tijssen, and Yigal M Pinto. Circulating micrnas novel biomarkers and extracellular communicators in cardiovascular disease? *Circulation research*, 110(3): 483–495, 2012.
- Kevin Davies. *The \$1,000 genome: the revolution in DNA sequencing and the new era of personalized medicine*. Simon and Schuster, 2010.
- Cees Dekker. Solid-state nanopores. *Nature nanotechnology*, 2(4):209–215, 2007.
- Berta Dopico, Alexandra L Lowe, Ian D Wilson, Carmen Merodio, and Donald Grierson. Cloning and characterization of avocado fruit mrnas and their expression during ripening and low-temperature storage. *Plant molecular biology*, 21(3):437–449, 1993.
- Eric Dugat-Bony, Cécile Straub, Aurélie Teissandier, Djamila Onésime, Valentin Loux, Christophe Monnet, Françoise Irlinger, Sophie Landaud, Marie-Noëlle Leclercq-Perlat, Pascal Bento, et al. Overview of a surface-ripened cheese community functioning by meta-omics analyses. *PloS one*, 10(4), 2015.
- Dhruva J Dwivedi, Lisa J Toltl, Laura L Swystun, Janice Pogue, Kao-Lee Liaw, Jeffrey I Weitz, Deborah J Cook, Alison E Fox-Robichaud, Patricia C Liaw, Canadian Critical Care Translational Biology Group, et al. Prognostic utility and characterization of cell-free dna in patients with severe sepsis. *Crit Care*, 16(4):R151, 2012.
- Yaniv Erlich and Arvind Narayanan. Routes for breaching and protecting genetic privacy. *Nature Reviews Genetics*, 15(6):409–421, 2014.
- Sabina Fijan and Sonja Šostar Turk. Hospital textiles, are they a possible vehicle for healthcare-associated infections? *International journal of environmental research and public health*, 9(9): 3330–3343, 2012.

Andrea Galimberti, Fabrizio De Mattia, Alessia Losa, Ilaria Bruni, Silvia Federici, Maurizio Casiraghi, Stefano Martellos, and Massimo Labra. Dna barcoding as a new tool for food traceability. *Food Research International*, 50(1):55–63, 2013.

Megan Gambino. Creepy or cool? portraits derived from the dna in hair and gum found in public places. <http://www.smithsonianmag.com/science-nature/creepy-or-cool-portraits-derived-from-the-dna-in-hair-and-gum-found-in-public-places-5026?no-ist>, 2013. Accessed: 2015-05-05.

Jianye Ge, Arthur Eisenberg, and Bruce Budowle. Developing criteria and data to determine best options for expanding the core codis loci. *Investig Genet*, 3(1), 2012.

Stephen K Gire, Augustine Goba, Kristian G Andersen, Rachel SG Sealfon, Daniel J Park, Lansana Kanneh, Simbirie Jalloh, Mambu Momoh, Mohamed Fullah, Gytis Dudas, et al. Genomic surveillance elucidates ebola virus origin and transmission during the 2014 outbreak. *Science*, 345(6202):1369–1372, 2014.

Nick Goldman, Paul Bertone, Siyuan Chen, Christophe Dessimoz, Emily M LeProust, Botond Sipos, and Ewan Birney. Towards practical, high-capacity, low-maintenance information storage in synthesized dna. *Nature*, 494(7435):77–80, 2013.

A Gonzalez, J Pettengill, Y Vazquez-Baeza, A Ottesen, and R Knight. Accurate detection of pathogens in microbial samples (and avoiding the conclusion that the platypus rules the earth). <http://i.imgur.com/Up4mGEE.png&https://github.com/biocore/Platypus-Conquistador>, 2014. Accessed: 2015-05-05.

Eric D Green, Mark S Guyer, National Human Genome Research Institute, et al. Charting a course for genomic medicine from base pairs to bedside. *Nature*, 470(7333):204–213, 2011.

Melissa Gymrek, Amy L McGuire, David Golan, Eran Halperin, and Yaniv Erlich. Identifying personal genomes by surname inference. *Science*, 339(6117):321–324, 2013.

Elizabeth E Joh. Reclaiming’abandoned’dna: The fourth amendment and genetic privacy. *Northwestern University Law Review*, 100:857, 2006.

Manfred Kayser and Peter de Knijff. Improving human forensics through advances in genetics, genomics and molecular biology. *Nature Reviews Genetics*, 13(10):753–753, 2012.

Joyce Kim and Sara H Katsanis. Brave new world of human-rights dna collection. *Trends in Genetics*, 29(6):329–332, 2013.

Gary M King. Urban microbiomes and urban ecology: How do microbes in the built environment affect human sustainability in cities? *Journal of Microbiology*, 52(9):721–728, 2014.

Sasha F Levy, Jamie R Blundell, Sandeep Venkataram, Dmitri A Petrov, Daniel S Fisher, and Gavin Sherlock. Quantitative evolutionary dynamics using high-resolution lineage tracking. *Nature*, 2015.

- Zhen Lin, Art B Owen, and Russ B Altman. Genomic research and human subject privacy. *SCIENCE-NEW YORK THEN WASHINGTON-*, pages 183–183, 2004.
- Nicholas J Loman and Mick Watson. Successful test launch for nanopore sequencing. *Nature methods*, 12(4):303–304, 2015.
- Christopher Mason. The long road from data to wisdom, and from dna to pathogen. <http://microbe.net/2015/02/17/the-long-road-from-data-to-wisdom-and-from-dna-to-pathogen/>, 2015. Accessed: 2015-05-05.
- James Clerk Maxwell. On faraday’s lines of force. *Transactions of the Cambridge Philosophical Society*, 10:27, 1864.
- Varvara Mouchtouri, Emmanuel Velonakis, Andreas Tsakalof, Christina Kapoula, Georgia Goutziana, Alkiviadis Vatopoulos, Jenny Kremastinou, and Christos Hadjichristodoulou. Risk factors for contamination of hotel water distribution systems by legionella species. *Applied and environmental microbiology*, 73(5):1489–1492, 2007.
- Sharon Ohayon, Matthew Boyko, Amit Saad, Amos Douvdevani, Benjamin F Gruenbaum, Israel Melamed, Yoram Shapira, Vivian I Teichberg, and Alexander Zlotnik. Cell-free dna as a marker for prediction of brain damage in traumatic brain injury in rats. *Journal of neurotrauma*, 29(2):261–267, 2012.
- Bogdan Pasaniuc, Nadin Rohland, Paul J McLaren, Kiran Garimella, Noah Zaitlen, Heng Li, Namrata Gupta, Benjamin M Neale, Mark J Daly, Pamela Sklar, et al. Extremely low-coverage sequencing and imputation increases power for genome-wide association studies. *Nature genetics*, 44(6):631–635, 2012.
- Presidential Commission for the Study of Bioethical Issues. Privacy and progress in whole genome sequencing. <http://bioethics.gov/cms/sites/default/files/PrivacyProgress508.pdf>, 2012. Accessed: 2015-05-05.
- Michela Puddu, Daniela Paunescu, Wendelin J Stark, and Robert N Grass. Magnetically recoverable, thermostable, hydrophobic dna/silica encapsulates and their application as invisible oil tags. *ACS nano*, 8(3):2677–2685, 2014.
- Laura L Rodriguez, Lisa D Brooks, Judith H Greenberg, and Eric D Green. The complexities of genomic identifiability. *Science*, 339(6117):275–276, 2013.
- Holger Rohde, Junjie Qin, Yujun Cui, Dongfang Li, Nicholas J Loman, Moritz Hentschke, Wentong Chen, Fei Pu, Yangqing Peng, Junhua Li, et al. Open-source genomic analysis of shiga-toxin-producing e. coli o104: H4. *New England Journal of Medicine*, 365(8):718–724, 2011.
- Jay Shendure and Erez Lieberman Aiden. The expanding scope of dna sequencing. *Nature biotechnology*, 30(11):1084–1094, 2012.

Susannah G Tringe, Tao Zhang, Xuguo Liu, Yiting Yu, Wah Heng Lee, Jennifer Yap, Fei Yao, Sim Tiow Suan, Seah Keng Ing, Matthew Haynes, et al. The airborne metagenome in an indoor urban environment. *PloS one*, 3(4):e1862, 2008.

US Department of State. 2014 TRAFFICKING IN PERSONS REPORT. <http://www.state.gov/documents/organization/226844.pdf>, 2014. Accessed: 2015-05-05.

Maniesh Van Der Vaart and Piet J Pretorius. Circulating dna. *Annals of the New York Academy of Sciences*, 1137(1):18–26, 2008.

Bala Murali Venkatesan and Rashid Bashir. Nanopore sensors for nucleic acid analysis. *Nature nanotechnology*, 6(10):615–624, 2011.

Kai Wang, Shile Zhang, Bruz Marzolf, Pamela Troisch, Amy Brightman, Zhiyuan Hu, Leroy E Hood, and David J Galas. Circulating micrnas, potential biomarkers for drug-induced liver injury. *Proceedings of the National Academy of Sciences*, 106(11):4402–4407, 2009.

Craig Whitlock and Barton Gellman. To hunt osama bin laden, satellites watched over abbotabad, pakistan, and navy SEALs. [http://www.washingtonpost.com/world/national-security/to-hunt-osama-bin-laden-satellites-watched-over-abbotabad-pakistan-and-navy-seals/2013/08/29/8d32c1d6-10d5-11e3-b4cb-fd7ce041d814\\_story.html](http://www.washingtonpost.com/world/national-security/to-hunt-osama-bin-laden-satellites-watched-over-abbotabad-pakistan-and-navy-seals/2013/08/29/8d32c1d6-10d5-11e3-b4cb-fd7ce041d814_story.html), 2013. Accessed: 2015-05-05.

Benjamin E Wolfe and Rachel J Dutton. Fermented foods as experimentally tractable microbial ecosystems. *Cell*, 161(1):49–55, 2015.

Anthony M Zador, Joshua Dubnau, Hassana K Oyibo, Huiqing Zhan, Gang Cao, and Ian D Peikon. Sequencing the connectome. *PLoS biology*, 10(10):e1001411, 2012.
